# Supplementary material
Source: ML conference proceedings conference paper supplement (https://aclanthology.org/W19-8652)
Supplement: Supplementary_Attachment [file W19-8652.Supplementary_Attachment.pdf]

## Semantic Noise Matters for Neural Natural Language Generation: Supplementary

| TRAIN           | TEST     | System  | Add   | Miss   | Wrong  | InstOK |
|-----------------|----------|---------|-------|--------|--------|--------|
| Original        |          | TGen-   | 2.8   | 686.2  | 4.8    | 192.2  |
|                 |          | TGen    | 6.0   | 178.8  | 1.2    | 496.4  |
|                 |          | TGen+   | 1.6   | 76.2   | 0.4    | 558.2  |
|                 |          | SC-LSTM | 121.6 | 823.6  | 426.2  | 7.8    |
| Cleaned         | Original | TGen-   | 8.8   | 24.2   | 9.0    | 591.6  |
|                 |          | TGen    | 4.2   | 0.8    | 0.2    | 624.8  |
|                 |          | TGen+   | 1.0   | 0.2    | 0.2    | 628.6  |
|                 |          | SC-LSTM | 167.6 | 757.2  | 353.4  | 14.0   |
| Cleaned missing |          | TGen-   | 6.0   | 98.2   | 9.4    | 525.2  |
|                 |          | TGen    | 2.6   | 19.0   | 1.4    | 608.0  |
|                 |          | TGen+   | 0.0   | 9.0    | 1.4    | 620.6  |
| Cleaned added   |          | TGen-   | 0.4   | 569.2  | 0.2    | 234.0  |
|                 |          | TGen    | 2.0   | 132.2  | 0.2    | 501.6  |
|                 |          | TGen+   | 0.2   | 62.8   | 0.2    | 567.0  |
| Original        |          | TGen-   | 39.4  | 1135.6 | 17.8   | 1089.4 |
|                 |          | TGen    | 45.6  | 415.4  | 7.8    | 1469.8 |
|                 |          | TGen+   | 23.6  | 230.2  | 5.2    | 1608.8 |
|                 |          | SC-LSTM | 858.6 | 1972.2 | 1057.6 | 39.0   |
| Cleaned         | Cleaned  | TGen-   | 19.0  | 151.2  | 28.6   | 1667.8 |
|                 |          | TGen    | 7.8   | 83.0   | 9.6    | 1751.4 |
|                 |          | TGen+   | 1.8   | 72.6   | 7.0    | 1768.8 |
|                 |          | SC-LSTM | 876.2 | 1732.4 | 937.4  | 78.0   |
| Cleaned missing |          | TGen-   | 49.4  | 328.4  | 30.0   | 1482.6 |
|                 |          | TGen    | 42.8  | 162.0  | 10.8   | 1643.2 |
|                 |          | TGen+   | 24.0  | 120.0  | 8.0    | 1702.8 |
| Cleaned added   |          | TGen-   | 2.2   | 1340.2 | 2.8    | 959.8  |
|                 |          | TGen    | 6.0   | 373.6  | 1.8    | 1518.6 |
|                 |          | TGen+   | 0.8   | 216.6  | 0.8    | 1646.2 |

Table 5: Absolute numbers of errors (added slots/missed slots/wrong slot values) and numbers of completely correct instances in all our experiments (compare to Tables 2 and 3 in the paper). Note that (1) the numbers are averages over 5 runs with different random network initializations, hence the non-integer values; (2) only numbers in the top half and the bottom half (with the same test set) are comparable. The original test set has 630 MRs and 4,352 slots in total. The cleaned test set has 1,847 MRs and 11,547 slots; however, for the runs with SC-LSTM these counts are 1,800 and 11,101, respectively, since some items had to be dropped due to preprocessing issues.
